# Supplementary material for: Inhibition of JAK2/STAT3 signaling pathway by panaxadiol limits the progression of pancreatic cancer
Source: publisher site journal article supplement (doi:10.18632/aging.203575), 2021-10-08
Supplement: Supplementary file [file aging-v13i19-203575-supplementary-material-SD1.pdf]

## SUPPLEMENTARY FIGURE

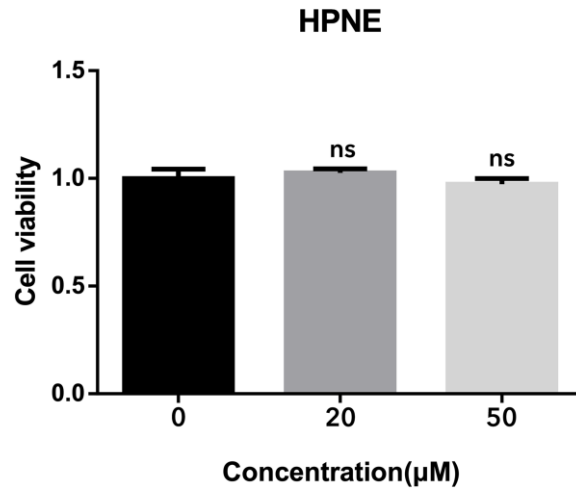

**Supplementary Figure 1. Panaxadiol did no obvious effect on human normal cells HPNE.** After being incubated with panaxadiol for 24 h, the cell viability of HPNE was not altered significantly. ns,  $P < 0.05$ .
